# Supplementary material for: Dopamine Release Neuroenergetics in Mouse Striatal Slices
Source: MDPI journal article supplement (doi:10.3390/ijms25094580), 2024-04-23
Supplement: s1 [file s1]

# Supplementary Tabel S1

## Statistics about two-way ANOVA

| Figure                               | ANOVA Table      | n   | F                        | P       |
|--------------------------------------|------------------|-----|--------------------------|---------|
| 2D – dSTR CTRL vs NAcc shell CTRL    | Time x condition | 6,6 | (19, 190) = 0.9466       | 0.5265  |
|                                      | Time (min)       |     | (4.257, 42.57) = 1.841   | 0.1351  |
|                                      | Condition        |     | (1, 10) = 1.369          | 0.2692  |
| 3A – dSTR NO GLC vs CTRL             | Time x condition | 6,6 | (19, 190) = 10.26        | <0.0001 |
|                                      | Time (min)       |     | (3.735, 37.35) = 10.20   | <0.0001 |
|                                      | Condition        |     | (1, 10) = 28.69          | 0.0003  |
| 3B – NAcc shell NO GLC vs CTRL       | Time x condition | 6,6 | F (19, 190) = 12.13      | <0.0001 |
|                                      | Time (min)       |     | F (19, 190) = 14.29      | <0.0001 |
|                                      | Condition        |     | F (1, 10) = 35.10        | 0.0001  |
| 3C – dSTR vs NAcc shell NO GLC       | Time x condition | 6,6 | F (19, 190) = 1.118      | 0.3356  |
|                                      | Time (min)       |     | F (19, 190) = 26.03      | <0.0001 |
|                                      | Condition        |     | F (1, 10) = 4.775        | 0.0538  |
| 4A – dSTR IA vs CTRL                 | Time x condition | 6,6 | F (19, 190) = 5.128      | <0.0001 |
|                                      | Time (min)       |     | F (19, 190) = 5.100      | <0.0001 |
|                                      | Condition        |     | F (1, 10) = 60.09        | <0.0001 |
| 4B – NAcc shell IA vs CTRL           | Time x condition | 6,6 | F (19, 190) = 38.48      | <0.0001 |
|                                      | Time (min)       |     | F (3.751, 37.51) = 47.60 | <0.0001 |
|                                      | Condition        |     | F (1, 10) = 124.0        | <0.0001 |
| 4C – dSTR IA vs NAcc shell IA        | Time x condition | 6,6 | F (19, 190) = 4.666      | <0.0001 |
|                                      | Time (min)       |     | F (19, 190) = 25.82      | <0.0001 |
|                                      | Condition        |     | F (1, 10) = 21.90        | 0.0009  |
| 4D – dSTR IA vs NO GLC               | Time x condition | 6,6 | F (19, 190) = 0.4566     | 0.9758  |
|                                      | Time (min)       |     | F (3.435, 34.35) = 15.77 | <0.0001 |
|                                      | Condition        |     | F (1, 10) = 4.328        | 0.0642  |
| 4E – NAcc IA vs NO GLC               | Time x condition | 6,6 | F (19, 190) = 3.785      | <0.0001 |
|                                      | Time (min)       |     | F (3.295, 32.95) = 55.82 | <0.0001 |
|                                      | Condition        |     | F (1, 10) = 14.88        | 0.0032  |
| 5A – dSTR PYU + NO GLC vs CTRL       | Time x condition | 5,6 | F (19, 171) = 1.577      | 0.0668  |
|                                      | Time (min)       |     | F (3.980, 35.82) = 1.213 | 0.3223  |
|                                      | Condition        |     | F (19, 171) = 1.577      | 0.1183  |
| 5B – NAcc shell PYU + NO GLC vs CTRL | Time x condition | 5,6 | F (19, 171) = 9.092      | <0.0001 |
|                                      | Time (min)       |     | F (19, 171) = 14.05      | <0.0001 |
|                                      | Condition        |     | F (1, 9) = 181.5         | <0.0001 |
| 5C– dSTR vs NAcc shell PYU + NO GLC  | Time x condition | 5,5 | F (19, 152) = 5.022      | <0.0001 |
|                                      | Time (min)       |     | F (19, 152) = 10.39      | <0.0001 |
|                                      | Condition        |     | F (1, 8) = 107.8         | <0.0001 |
| 6A – dSTR ROT vs CTRL                | Time x condition | 5,6 | F (19, 171) = 15.21      | <0.0001 |
|                                      | Time (min)       |     | F (4.668, 42.01) = 15.39 | <0.0001 |
|                                      | Condition        |     | F (1, 9) = 82.27         | <0.0001 |
| 6B – NAcc shell ROT vs CTRL          | Time x condition | 5,6 | F (19, 171) = 6.943      | <0.0001 |
|                                      | Time (min)       |     | F (19, 171) = 9.689      | <0.0001 |
|                                      | Condition        |     | F (1, 9) = 8.664         | 0.0164  |

|                                            |                  |     |                           |         |
|--------------------------------------------|------------------|-----|---------------------------|---------|
| 6C– dSTR vs NAcc shell ROT                 | Time x condition | 5,5 | F (19, 152) = 2.464       | 0.0013  |
|                                            | Time (min)       |     | F (19, 152) = 39.56       | <0.0001 |
|                                            | Condition        |     | F (1, 8) = 10.09          | 0.0131  |
| 7A – dSTR<br>4CIN vs CTRL                  | Time x condition | 6,6 | F (19, 190) = 1.857       | 0.0195  |
|                                            | Time (min)       |     | F (4.781, 47.81) = 1.768  | 0.1403  |
|                                            | Condition        |     | F (1, 10) = 20.09         | 0.0012  |
| 7B – NAcc shell<br>4CIN vs CTRL            | Time x condition | 6,6 | F (19, 190) = 0.9709      | 0.4972  |
|                                            | Time (min)       |     | F (2.649, 26.49) = 0.8159 | 0.4834  |
|                                            | Condition        |     | F (1, 10) = 0.8536        | 0.3773  |
| 7C – dSTR vs NAcc shell<br>4CIN            | Time x condition | 6,6 | F (19, 190) = 1.794       | 0.0258  |
|                                            | Time (min)       |     | F (2.660, 26.60) = 0.4456 | 0.6998  |
|                                            | Condition        |     | F (1, 10) = 6.439         | 0.0295  |
| 8A – dSTR<br>4CIN + NO GLC vs NO GLC       | Time x condition | 6,6 | F (19, 190) = 1.903       | 0.0158  |
|                                            | Time (min)       |     | F (4.320, 43.20) = 46.47  | <0.0001 |
|                                            | Condition        |     | F (1, 10) = 16.03         | 0.0025  |
| 8B – NAcc shell<br>4CIN + NO GLC vs NO GLC | Time x condition | 6,6 | F (19, 190) = 0.8208      | 0.6806  |
|                                            | Time (min)       |     | F (19, 190) = 45.73       | <0.0001 |
|                                            | Condition        |     | F (1, 10) = 5.051         | 0.0484  |
| 8C– dSTR vs NAcc shell<br>4CIN + NO GLC    | Condition        | 6,6 | F (19, 190) = 2.275       | 0.0027  |
|                                            | Time (min)       |     | F (19, 190) = 89.01       | <0.0001 |
|                                            | Time x condition |     | F (1, 10) = 1.434         | 0.2588  |
| 9A– dSTR Lac + NO GLC vs<br>CTRL           | Time x condition | 6,6 | F (19, 190) = 1.377       | 0.1421  |
|                                            | Time (min)       |     | F (3.290, 32.90) = 1.127  | 0.3552  |
|                                            | Condition        |     | F (1, 10) = 3.539         | 0.0893  |
| 9B – NAcc shell Lac + NO GLC<br>vs CTRL    | Time x condition | 6,6 | F (19, 190) = 1.849       | 0.0202  |
|                                            | Time (min)       |     | F (2.878, 28.78) = 5.639  | 0.0040  |
|                                            | Condition        |     | F (1, 10) = 84.08         | <0.0001 |
| 9C– dSTR vs NAcc shell Lac +<br>NO GLC     | Time x condition | 6,6 | F (19, 190) = 1.697       | 0.0395  |
|                                            | Time (min)       |     | F (19, 190) = 4.859       | <0.0001 |
|                                            | Condition        |     | F (1, 10) = 28.15         | 0.0003  |
